# Supplementary material for: Mixing state of individual submicron carbon-containing particles during spring and fall seasons in urban Guangzhou, China: a case study
Source: Copernicus journal article supplement (doi:10.5194/acp-13-4723-2013), 2013-05-07
Supplement: Supplementary file 1 [file acp-13-4723-2013-supplement.pdf]

1 **Supplementary Material:**

2

3 **Mixing state of individual submicron carbon-containing particles**  
4 **during spring and fall season in urban Guangzhou, China: a**  
5 **case study**

6

7 Guohua Zhang<sup>1,2</sup>, Xinhui Bi<sup>1,\*</sup>, Lei Li<sup>3</sup>, Lo Yin Chan<sup>1</sup>, Mei Li<sup>3</sup>, Xinming Wang<sup>1</sup>,

8 Guoying Sheng<sup>1</sup>, Jiamo Fu<sup>1,3</sup>, Zhen Zhou<sup>3</sup>

9

10 1. State Key Laboratory of Organic Geochemistry, Guangzhou Institute of

11 Geochemistry, Chinese Academy of Sciences, Guangzhou 510640, P. R. China

12 2. Graduate University of Chinese Academy of Sciences, Beijing 100039, P. R.

13 China

14 3. School of Environmental and Chemical Engineering, Shanghai University,

15 Shanghai 200444, P. R. China

16

17 Correspondence to: Xinhui Bi (bixh@gig.ac.cn)

18 Tel: +86-20-85290195

19 Fax: +86-20-85290288

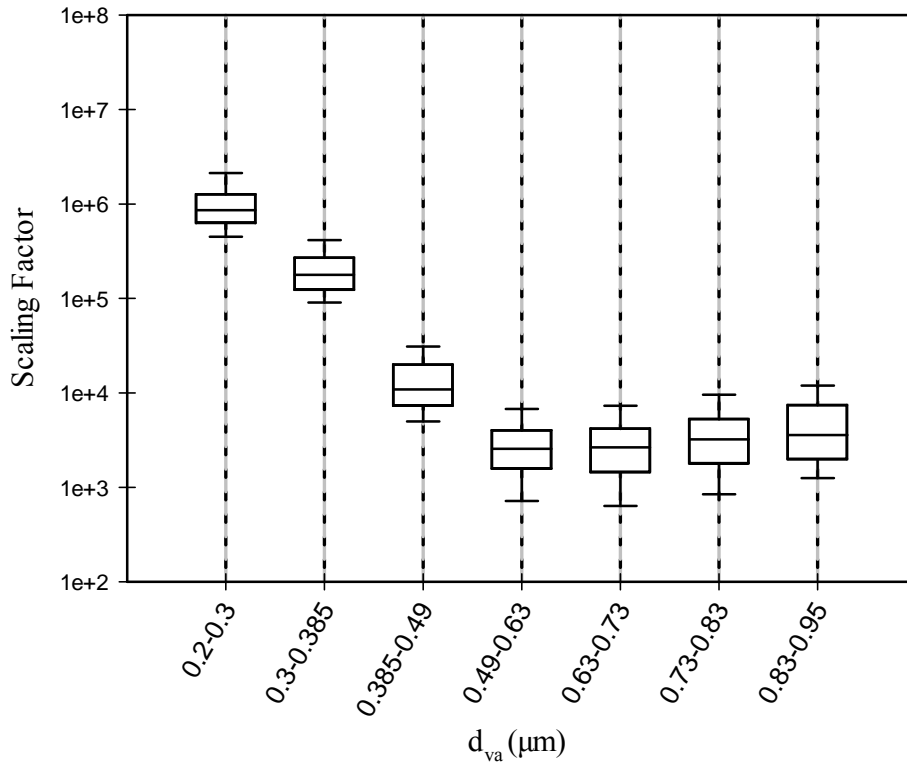

20

21

22 **Fig. S1.** Box-whisker plots of SPAMS scaling factor using SMPS + C for Spring  
 23 period 2010 in Guangzhou. The median (line in the box), quartile (box), 10% and 90%  
 24 percentile (whiskers) were shown. The size-dependence pattern of the scaling factor is  
 25 similar to those described in earlier studies with single particle mass spectrometry  
 26 (Healy et al., 2012; Jeong et al., 2011).

27 Scaling procedure for SPAMS data: firstly, the conversion of  $d_m$  to  $d_{va}$  was  
 28 performed according to the methodology described by (DeCarlo et al., 2004):

$$29 \quad d_{va} = \rho_p / \rho_0 \times d_{ve} / \chi$$

30 where  $\rho_p$  is the particle density,  $\rho_0$  is standard density ( $1 \text{ g cm}^{-3}$ ),  $d_{ve}$  is particle  
 31 volume equivalent diameter, and  $\chi$  is the dynamic shape factor (assumed to be 1). All  
 32 particles were assumed to be spherical with no internal voids, thus  $d_m$  is equal to  $d_{ve}$ .

33 A single density value of  $1.7 \text{ g cm}^{-3}$  (Cheng et al., 2006) was chosen to convert the  $d_m$   
34 to  $d_{va}$ . Certain error might also be introduced based on the usage of an assumed  
35 density for scaling process, while previous work has attained satisfactory results  
36 (Healy et al., 2012; Reinard et al., 2007). Secondly, the particle size range from  
37 SPAMS was divided into seven size bins (0.2-0.3, 0.3-0.39, 0.39-0.49, 0.49-0.63,  
38 0.63-0.73, 0.73-0.83 and 0.83-0.95  $\mu\text{m}$ ), corresponding to seven size bins from SMPS  
39 + C created by merging adjacent pairs of size bins, approximately covering a  $d_m$  size  
40 range of 124-521 nm (mid-point). Thirdly, scaling factor was calculated for each size  
41 bin through dividing the size-segregated hourly average number concentration from  
42 SMPS + C by the simultaneously observed hourly total SPAMS particle number count  
43 in the corresponding size bin (Rehbein et al., 2012). The hourly scaling factors in each  
44 size range were utilized in scaling the number concentration of particles by directly  
45 multiplying SPAMS counts of each single particle type of the exactly same size range  
46 in that hour.

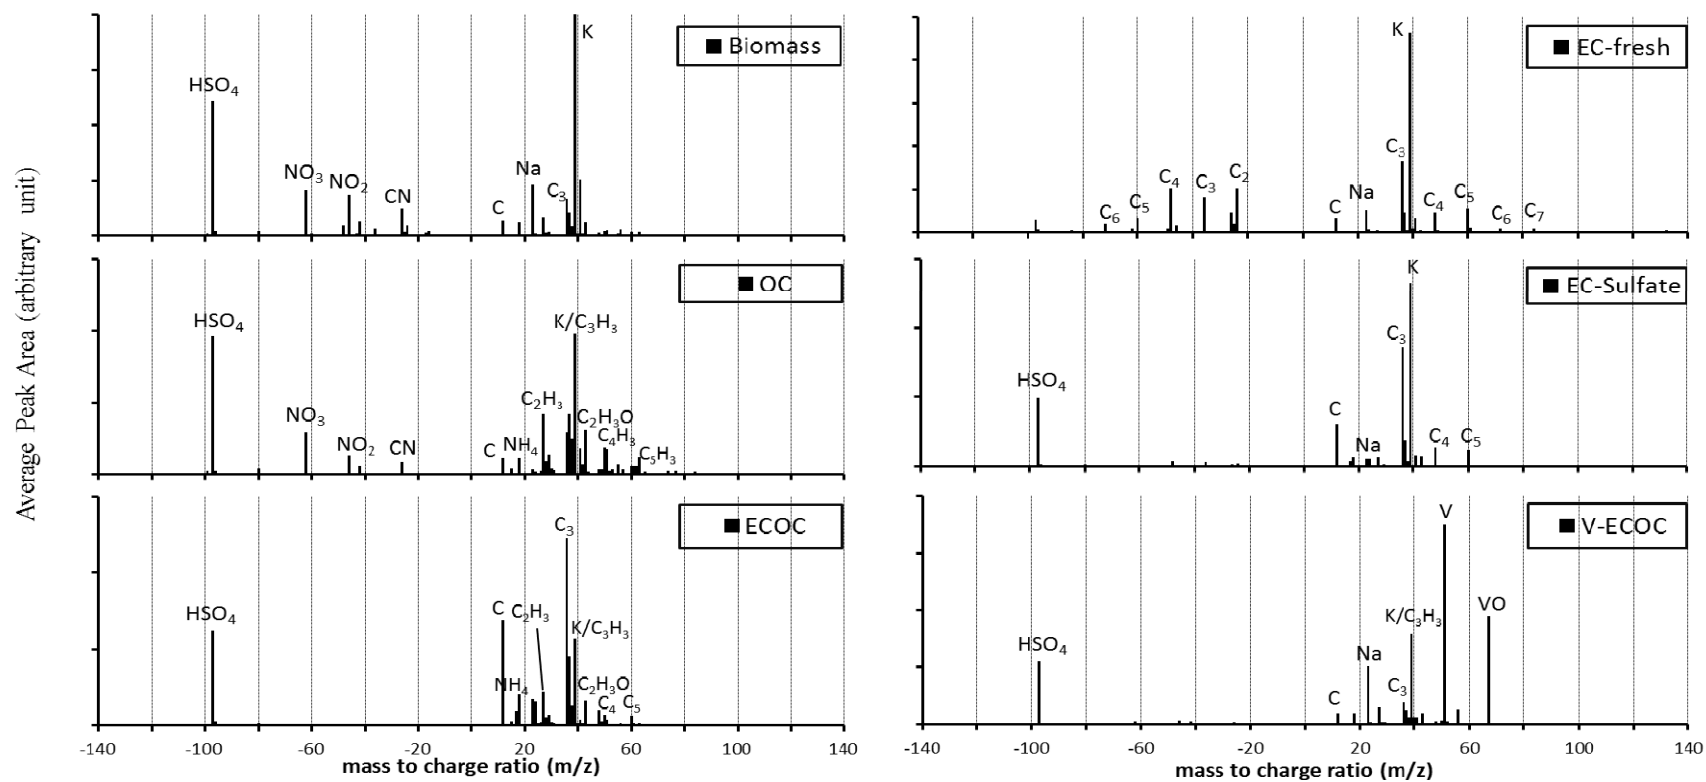

57

58 **Fig. S2.** Averaged positive and negative mass spectra for the 6 single particle carbon-containing classes observed during the fall sampling period.

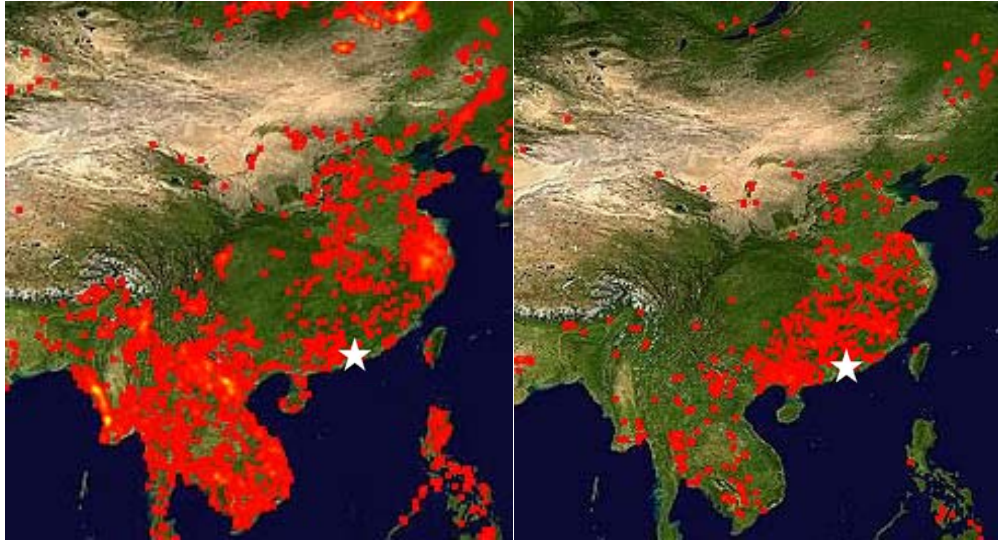

59

60

61 **Fig. S3.** Fire maps from MODIS on board the Terra and Aqua satellites during  
62 2010/05/01-2010/05/10 (left), and 2010/11/07-2010/11/16 (right). The fire map  
63 accumulates the locations of the fires over a 10-day period. Each colored dot indicates  
64 a location where MODIS detected at least one fire during the compositing period. The  
65 star marker signifies the location of sampling site.

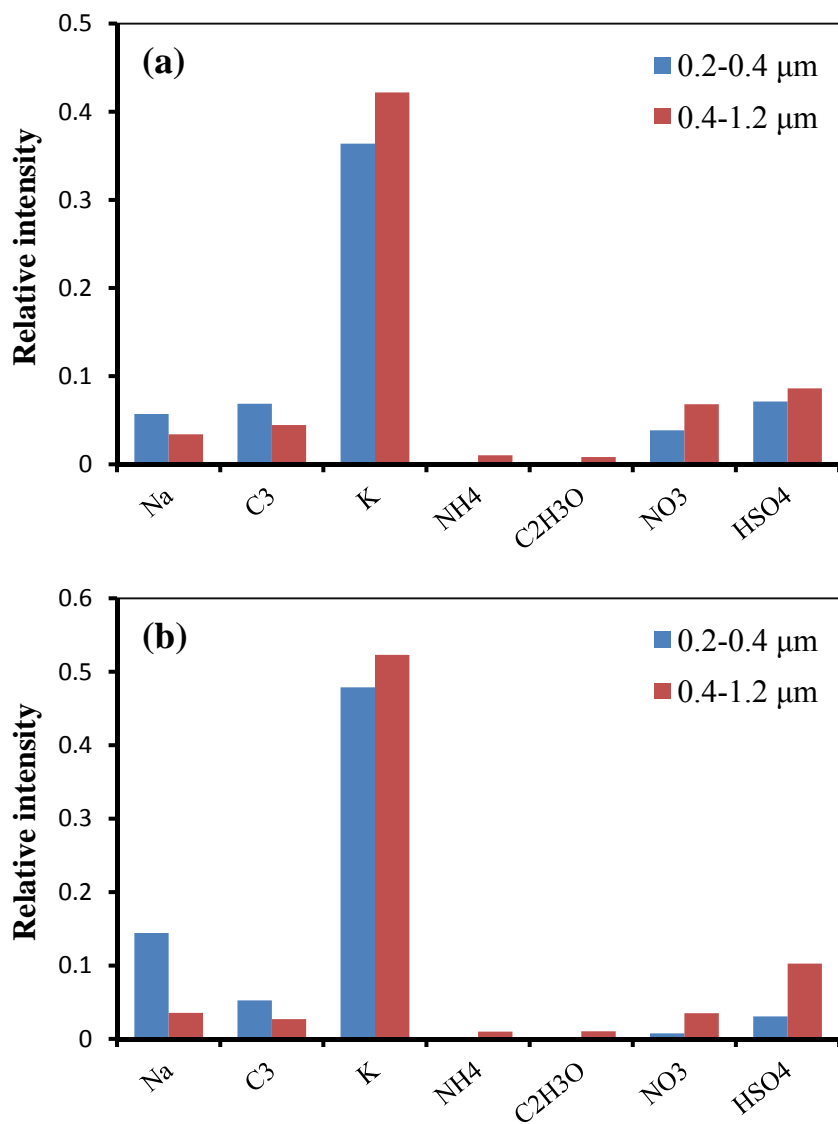

66

67

68 **Fig. S4.** Comparison of relative intensity for different species in smaller (0.2-0.4  $\mu\text{m}$ )

69 and larger (0.4-1.2  $\mu\text{m}$ ) Biomass particles during spring (a) and fall period (b),

70 respectively.

71 **References**

- 72 Cheng, Y. F., Eichler, H., Wiedensohler, A., Heintzenberg, J., Zhang, Y. H., Hu, M.,  
73 Herrmann, H., Zeng, L. M., Liu, S., and Gnauk, T.: Mixing state of elemental carbon and  
74 non-light-absorbing aerosol components derived from in situ particle optical properties  
75 at Xinken in Pearl River Delta of China, *J. Geophys. Res.*, 111, D20204, 2006.
- 76 DeCarlo, P. F., Slowik, J. G., Worsnop, D. R., Davidovits, P., and Jimenez, J. L.: Particle  
77 morphology and density characterization by combined mobility and aerodynamic  
78 diameter measurements. Part 1: Theory, *Aerosol Sci. Tech.*, 38, 1185-1205, doi:  
79 10.1080/027868290903907, 2004.
- 80 Healy, R. M., Sciare, J., Poulain, L., Kamili, K., Merkel, M., Müller, T., Wiedensohler, A.,  
81 Eckhardt, S., Stohl, A., Sarda-Estève, R., McGillicuddy, E., O'Connor, I. P., Sodeau, J.  
82 R., and Wenger, J. C.: Sources and mixing state of size-resolved elemental carbon  
83 particles in a European megacity: Paris, *Atmos. Chem. Phys.*, 12, 1681-1700, doi:  
84 10.5194/acp-12-1681-2012, 2012.
- 85 Jeong, C. H., McGuire, M. L., Godri, K. J., Slowik, J. G., Rehbein, P. J. G., and Evans, G. J.:  
86 Quantification of aerosol chemical composition using continuous single particle  
87 measurements, *Atmos. Chem. Phys.*, 11, 7027-7044, doi: 10.5194/acp-11-7027-2011,  
88 2011.
- 89 Rehbein, P. J. G., Jeong, C.-H., McGuire, M. L., and Evans, G. J.: Strategies to Enhance the  
90 Interpretation of Single-Particle Ambient Aerosol Data, *Aerosol Sci. Tech.*, 46, 584-595,  
91 doi: 10.1080/02786826.2011.650334, 2012.
- 92 Reinard, M. S., Adou, K., Martini, J. M., and Johnston, M. V.: Source characterization and

93 identification by real-time single particle mass spectrometry, *Atmos. Environ.*, 41,  
94 9397-9409, doi: 10.1016/j.atmosenv.2007.09.001, 2007.
